# Supplementary material for: Numerical Simulations of Air Flow and Traffic–Related Air Pollution Distribution in a Real Urban Area
Source: MDPI journal article supplement (doi:10.3390/en15030840), 2022-01-24
Supplement: s1 [file s1]

## **Supplementary data**

### **Numerical simulations of air flow and traffic-related air pollution distribution in a real urban area**

Mengge Zhou<sup>1</sup>, Tingting Hu<sup>1\*</sup>, Guoyi Jiang<sup>2</sup>, Wenqi Zhang<sup>1</sup>, Dan Wang<sup>1</sup> and Pinhua Rao<sup>1</sup>

<sup>1</sup> College of Chemistry and Chemical Engineering, Shanghai University of Engineering Science, Shanghai 201620, China; M040119214@sues.edu.cn (M.Z.); zhangwenqi@sues.edu.cn (W.Z.); wd220115@163.com (D.W.); raopinhua@hotmail.com (P.R.)

<sup>2</sup> Department of Civil and Environmental Engineering, Shantou University, Shantou 515063, China; gyjiang@stu.edu.cn

\* Correspondence: tingtinghu@sues.edu.cn

This file includes:

Tables S1 – S2; Figure S1

**Table S1.** CFD setup conditions

| Spatial Discretization     |                          |
|----------------------------|--------------------------|
| Gradient                   | Least Squares Cell Based |
| Pressure                   | Standard                 |
| Momentum                   | QUICK                    |
| Turbulent Kinetic Energy   | QUICK                    |
| Turbulent Dissipation Rate | QUICK                    |
| User Scalar 0              | QUICK                    |
| User Scalar 1              | QUICK                    |

**Table S2.** Urban Form Indices

| Index                        | Definition of Index                                                   | Calculation Method                                                           | Research Content                                                                                                                                         |
|------------------------------|-----------------------------------------------------------------------|------------------------------------------------------------------------------|----------------------------------------------------------------------------------------------------------------------------------------------------------|
| Building Density (BD)        | Base area of buildings divided by the unit area of the neighborhood   | $BCR = \frac{\text{Building base area}}{\text{total neighborhood area}}$     | An increase in building density will increase the surface roughness, hinder the wind flow in the neighborhood, and increase the regional heat conduction |
| Floor Area Ratio (FAR)       | Ratio of total building area to neighborhood area                     | $FAR = \frac{\text{Total building area}}{\text{total area of neighborhood}}$ | High volumetric ratio will reduce airflow and hinder the diffusion of pollutants                                                                         |
| Space Openness (SO)          | Ratio of the total building area to the open space area in the region | $SO = (1 - \text{Building density}) / \text{Floor area ratio}$               | In the case of a constant building density, an increase in the floor area ratio will reduce the openness of the space                                    |
| Average Building Height (AH) | Average height of all buildings in the area                           | $AH = \frac{\text{Total building height}}{\text{number of buildings}}$       | It can be used to measure the volume of a building and indicate the vertical impact of the building on airflow and pollutants                            |

|                                             |                                                                                                            |                                                                                    |                                                                                                                             |
|---------------------------------------------|------------------------------------------------------------------------------------------------------------|------------------------------------------------------------------------------------|-----------------------------------------------------------------------------------------------------------------------------|
| Standard Deviation of Building Height (SDH) | Standard deviation of all building heights in the area                                                     | $SDH = \frac{\sum_{i=1}^n (h_i - \bar{h})^2}{n}$                                   | SDH represents the uplifting disturbance effect of the differences in building height in the area on airflow and pollutants |
| Mean Building Volume (MBV)                  | Average building volume in the study area                                                                  | $MBV = \frac{\text{Total building volume}}{\text{number of buildings}}$            | The total volume of the same building can be achieved by different building numbers, and show different aerodynamic effects |
| Degree of Enclosure (DE)                    | Ratio of the sum of the perimeters of all buildings in the area to the total perimeter of the neighborhood | $DE = \frac{\text{Perimeter of building}}{\text{total perimeter of neighborhood}}$ | Study the influence of building enclosure degree on airflow in a specific area                                              |

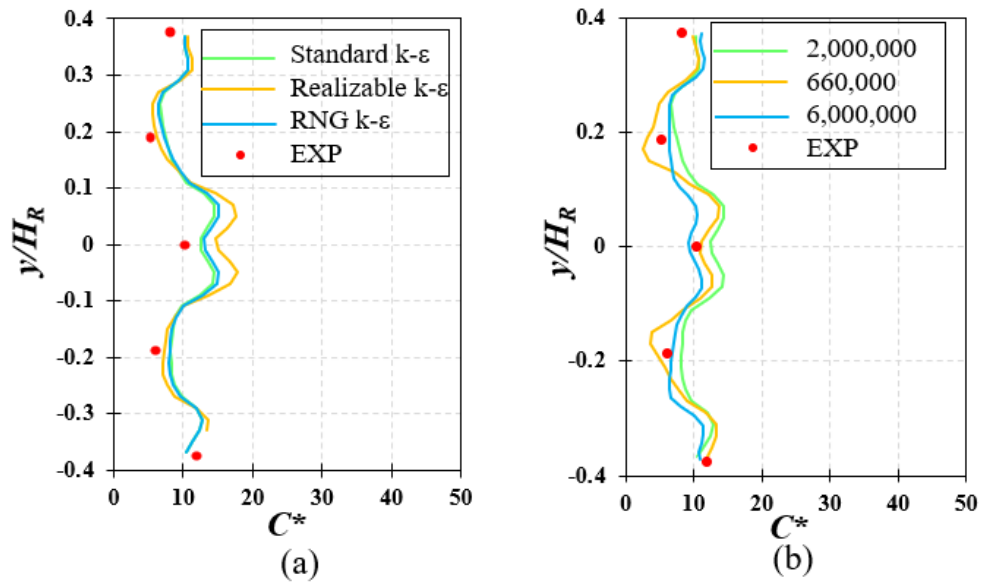

**Figure S1.** Turbulence model test (a) and mesh sensitivity test (b).
