# Supplementary material for: Numerical Simulations of Air Flow and Traffic–Related Air Pollution Distribution in a Real Urban Area
Source: MDPI journal article supplement (doi:10.3390/en15030840), 2022-01-24
Supplement: s1 [file s1]

Archive with 1 entries (1 files):
- energies-1544856-supplementary.pdf
